# Supplementary material
Source: Springer Nature journal article supplement (https://www.springermedizin.de/resource/supplementary/12889_2010_2077_MOESM3_ESM.pdf/9484514)
Supplement: MOESM3 [file 9484514]

Asked to participate  
N = 3000  
t<sub>1</sub>

Participated in 1st  
round  
N = 1.261 (42%)

Did not participate  
N = 1.737 (58%), from which:

Non-response  
with reason  
N = 514  
- Too confronting  
(36%)  
- No time/interst  
(16%)  
- Too personal  
(11%)

Non-response  
unknown  
reason  
N = 1.223

Deceased  
between t<sub>1</sub> & t<sub>2</sub>  
N = 18 (1%)

Participated in  
2nd round (t<sub>2</sub>)  
N = 1.119 (90%)

Did not participate in 2<sup>nd</sup> round  
N = 124 (10%), from which:

Moved,  
end mem-  
bership NPV  
or other  
reason  
N = 70

Unknown  
reason  
N = 54
